# Supplementary material for: Surface treatment of ZnO films with carbon nanotubes for efficient and stable perovskite solar cells
Source: Royal Society of Chemistry journal article supplement (doi:10.1039/d0se01493a), 2020-12-21
Supplement: d0se01493a1.pdf [file d0se01493a1.pdf]

## Supporting Information

### Surface Treatment of ZnO Film by Carbon Nanotubes for Efficient and Stable Perovskite Solar Cells

Mustafa K. A. Mohammed<sup>a\*</sup>, Masoud Shekargoftar<sup>b</sup>

<sup>a</sup>Technical Engineering College, Middle Technical University, Baghdad 100001, Iraq

<sup>b</sup>Department of Physical Electronics, Faculty of Science, Masaryk University , Kotlářská 267/2,  
611 37 Brno, Czech Republic

Email: [mustafa\\_kareem97@yahoo.com](mailto:mustafa_kareem97@yahoo.com)

Tel: +9647719047121

Figure 1 reveals the X-ray pattern of pure CNTs. As shown, a diffraction peak located at  $2\theta = 26.1^\circ$  attributed to (002) crystal facet. Additionally, other two weak peaks at  $42.8^\circ$  and  $44.7^\circ$  related to (100) and (101) crystal facets, respectively. This pattern of CNT matched well with standard graphitic phase (JCPDS: 01-0646) [1]. The FTIR spectrum of CNTs was recorded at room temperature as shown in Figure S1b. The peak at the wavenumber of  $1608\text{ cm}^{-1}$  is corresponded to the C=C stretching vibration of carbon backbone in the CNT structure [2]. The FTIR bands at  $1073\text{ cm}^{-1}$  and  $3345\text{ cm}^{-1}$  are assigned to the carbonyl (C-O) and hydroxyl (O-H) acid groups, respectively, indicating decorating CNTs with oxygenated functionalities after acid oxidation [3]. Besides, the C-H symmetric and asymmetric stretching vibrations are centered at wavenumbers of  $2921\text{ cm}^{-1}$  and  $2854\text{ cm}^{-1}$ , respectively [4]. The UV-vis absorption spectrum of CNTs suspended in water (Figure S1c) shows a strong absorption peak at 265 nm, which corresponds to an electronic transition ascribed of  $\pi-\pi^*$  transition within the  $sp^2$ -localized carbon atoms [5]. As shown in Figure S1d, TEM image of CNT drop-cast on a glass substrate demonstrates that pure CNTs appeared with long tube morphology and possess an entangled geometry, which further reveals the CNTs are one-dimensional nanostructured material. Clearly, from above findings, it can be confirmed that the desired CNTs have been successfully synthesized.

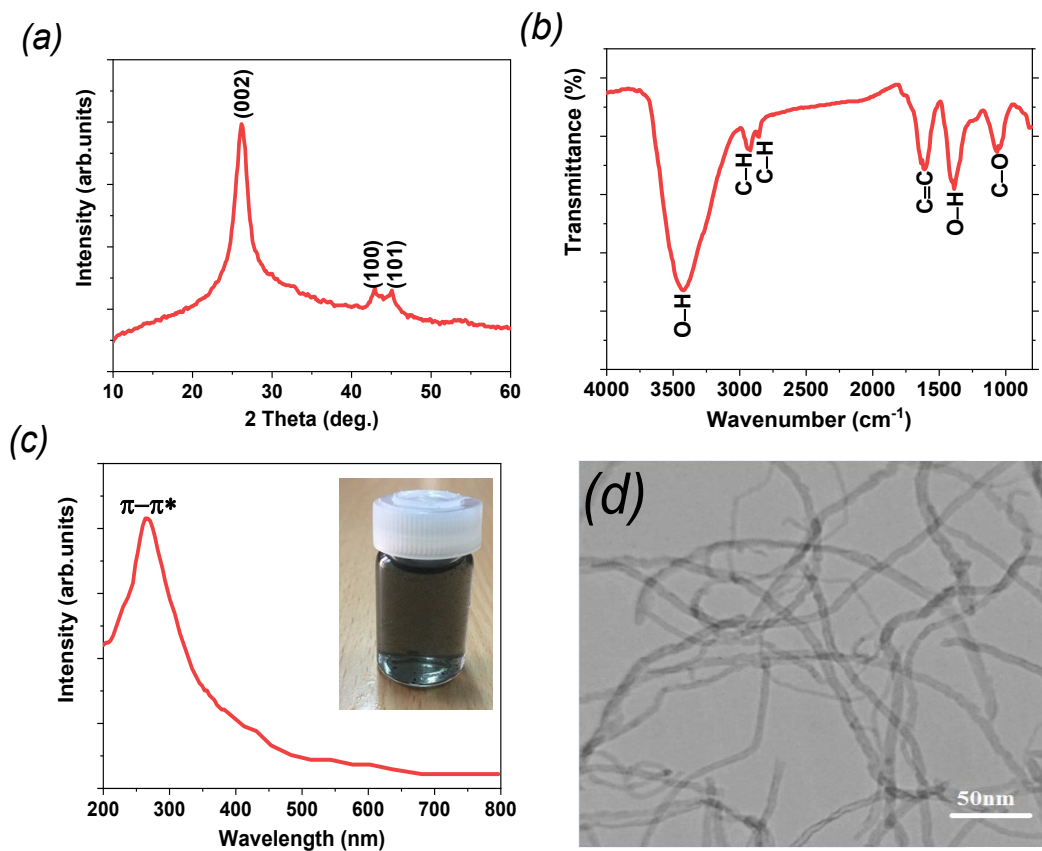

**Figure S1.** (a) XRD pattern of CNT. (b) FTIR spectrum of CNT. (c) UV-vis absorption spectrum of CNT.

Inset: the photograph of CNT suspension. (d) TEM image of CNT.

**Table S1.** J-V curves in reverse and forward scans of best-performing PSCs with and without CNT.

| Device         | $V_{oc}^a$ (V) | $J_{sc}^b$ (mA/cm <sup>2</sup> ) | FF <sup>c</sup> (%) | PCE <sup>d</sup> (%) | HI (%) |
|----------------|----------------|----------------------------------|---------------------|----------------------|--------|
| Reverse (Ref.) | 0.98           | 20.48                            | 75                  | 15.05                | 10.5   |
| Forward (Ref.) | 0.95           | 19.42                            | 73                  | 13.47                |        |
| Reverse (2%)   | 1.06           | 22.61                            | 80                  | 18.79                | 1.6    |
| Forward (2%)   | 1.058          | 22.41                            | 78                  | 18.49                |        |

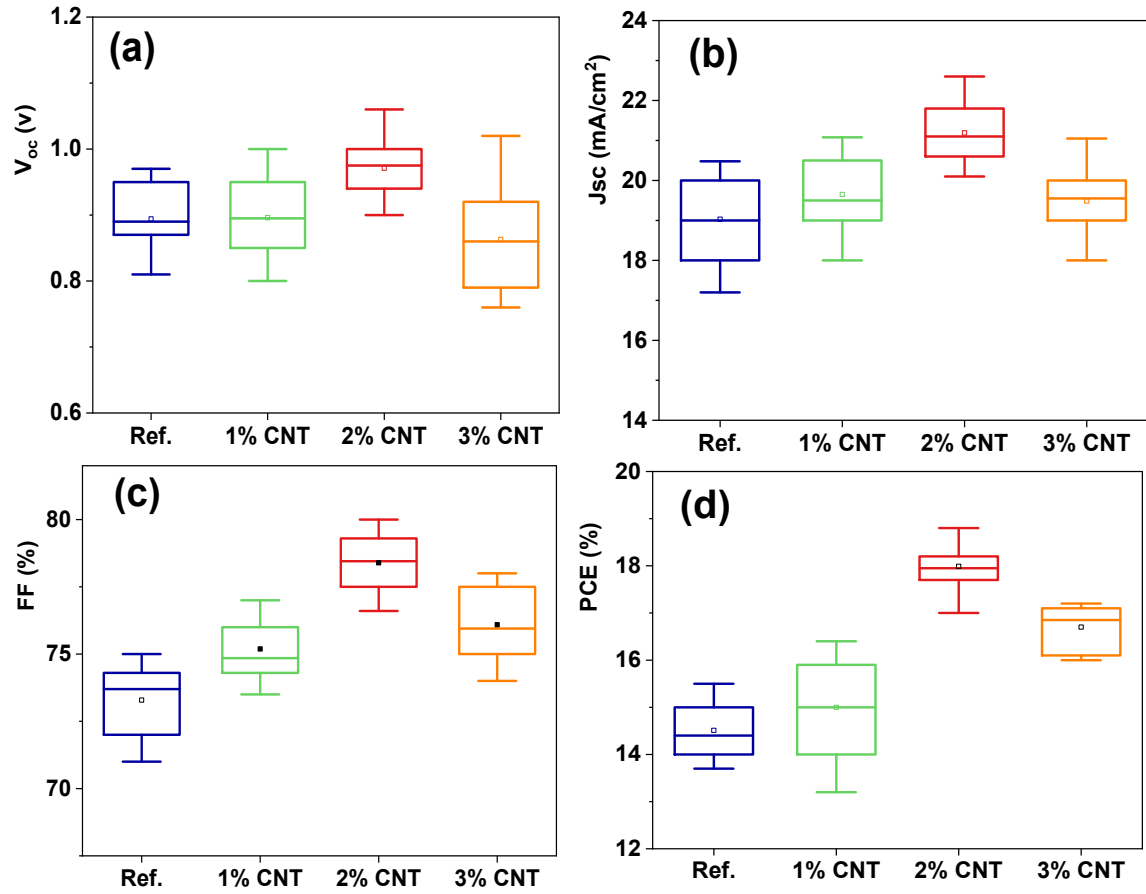

**Figure S2.** Device statistics of  $V_{OC}$ ,  $J_{SC}$ , FF, and PCE of PSCs using ETL incorporated with or without CNT modification. Every box shows the parameter distribution of 20 devices.

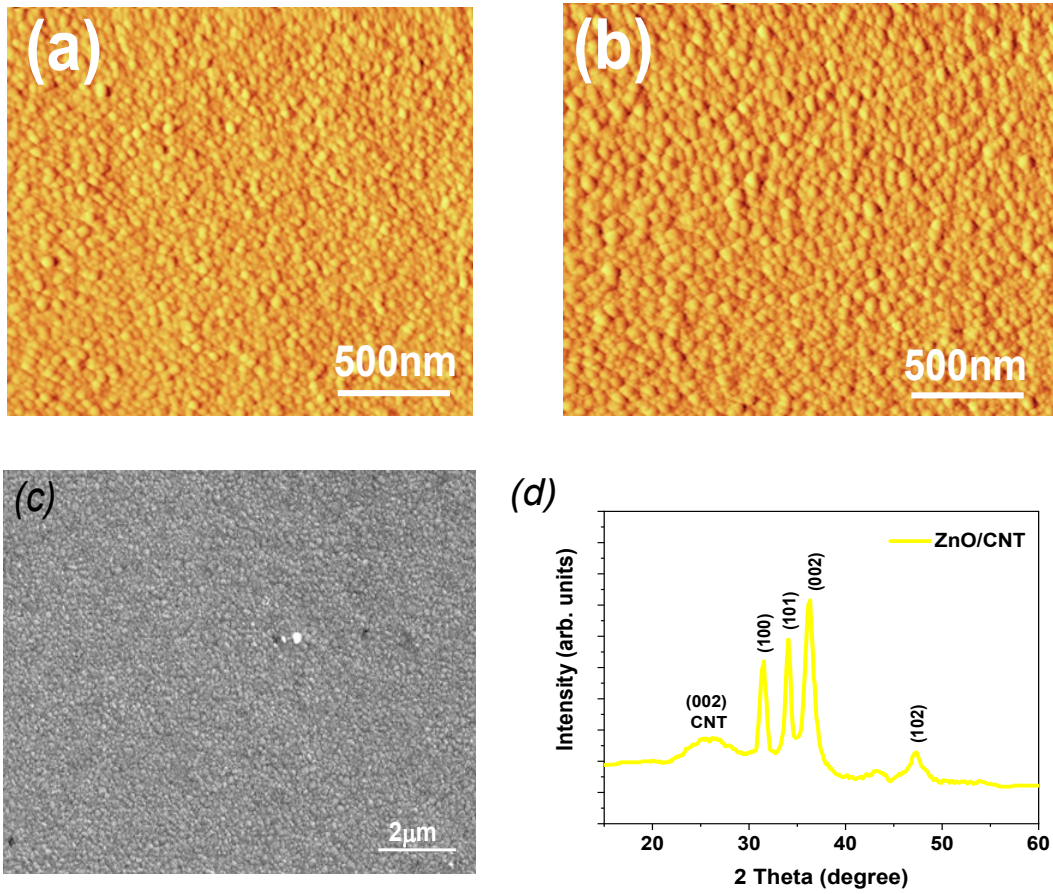

**Figure S3.** a) AFM image of pure ZnO. b) AFM image of ZnO-containing 2% CNT. c) SEM image of ZnO/CNT film. d) XRD pattern of ZnO/CNT film.

**Table S2.** Sumarized parametrs obtained from EIS analysis.

| Sample      | $Z_1'$ [ $\Omega$ ] | $Z_2'$ [ $\Omega$ ] |
|-------------|---------------------|---------------------|
| ZnO/PVK     | 2.9                 | 26.2                |
| ZnO:CNT/PVK | 1.6                 | 23.4                |

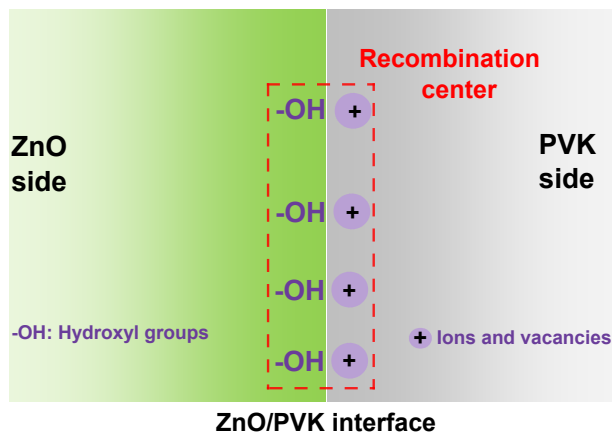

**Figure S4.** Illustration showing the positive ion localization caused by the surface-negative charges (-OH) of ZnO.

## References

- [1] M. K. A. Mohammed, A. K. Al-Mousoi, H. A. Khalaf, *Optik* **2016**, *127*, 9848–9852.
- [2] D. S. Ahmed, M. K. A. Mohammed, M. R. Mohammad, *Chem. Pap.* **2020**, *74*, 197–208.
- [3] M. K. A. Mohammed, *Optik* **2020**, *223*, 165607.
- [4] D. S. Ahmed, M. R. Mohammad, M. K. A. Mohammed, *Nanosci. Nanotechnol.-Asia* **2020**, *10*, 127–133.
